# Supplementary material for: On the crystal structure and optical spectroscopy of rare earth comprising quaternary tungstates Li3Ba2RE3(WO4)8 (RE = La–Nd, Sm–Ho)
Source: Royal Society of Chemistry journal article supplement (doi:10.1039/d1dt00795e), 2021-01-01
Supplement: d1dt00795e1.pdf [file d1dt00795e1.pdf]

***On the Crystal Structure and Optical Spectroscopy of Rare  
Earth Comprising Quaternary Tungstates***

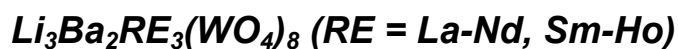

**Jan-Niklas Keil<sup>a</sup>, Christian Paulsen<sup>b</sup>, Florian Rosner<sup>a</sup>, Rainer Pöttgen<sup>b</sup>, and  
Thomas Jüstel<sup>a</sup>**

*<sup>a</sup>. Department of Chemical Engineering, FH Münster University of Applied  
Sciences, Stegerwaldstrasse 39, D-48565 Steinfurt, Germany*

*<sup>b</sup>. Institut für Anorganische und Analytische Chemie, Universität Münster,  
Corrensstrasse 30, D-48149 Münster, Germany*

Corresponding authors: [keil@fh-muenster.de](mailto:keil@fh-muenster.de), [tj@fh-muenster.de](mailto:tj@fh-muenster.de)

## Supporting tables

**Table S1:** Interatomic distances (pm) for  $\text{Li}_3\text{Ba}_2\text{Pr}_3(\text{WO}_4)_8$ . All distances of the first coordination spheres are listed. Standard deviations are given in parentheses.

|                   |                  |                     |
|-------------------|------------------|---------------------|
| W1: 1 O1 176(1)   | Ba1: 2 O6 273(1) | Pr/Li1: 1 O5 242(1) |
| 1 O3 178.4(9)     | 2 O8 274(1)      | 1 O3 245(1)         |
| 1 O2 180(1)       | 2 O1 288(1)      | 1 O7 248(1)         |
| 1 O4 181(1)       | 2 O5 296(1)      | 1 O7 248(1)         |
| W2: 1 O8 175.2(9) | Li2: 2 O1 199(3) | 1 O4 251(1)         |
| 1 O6 175(1)       | 2 O6 219(3)      | 1 O2 252(1)         |
| 1 O5 178.6(9)     | 2 O8 237(1)      | 1 O4 253(1)         |
| 1 O7 182(1)       |                  | 1 O2 255.2(9)       |

**Table S2:** Anisotropic displacement parameters ( $\text{pm}^2$ ) of  $\text{Li}_3\text{Ba}_2\text{Pr}_3(\text{WO}_4)_8$  and  $\text{Li}_3\text{Ba}_2\text{Tb}_3(\text{WO}_4)_8$ . Standard deviations are given in parentheses. The Li2 positions (Table 3) were refined isotropically.

| Atom                                               | $U_{11}$ | $U_{22}$ | $U_{33}$ | $U_{12}$ | $U_{13}$ | $U_{23}$ |
|----------------------------------------------------|----------|----------|----------|----------|----------|----------|
| $\text{Li}_3\text{Ba}_2\text{Pr}_3(\text{WO}_4)_8$ |          |          |          |          |          |          |
| W1                                                 | 102(2)   | 133(2)   | 108(3)   | 9(2)     | 22(2)    | 17(2)    |
| W2                                                 | 99(2)    | 117(2)   | 120(3)   | -3(2)    | 18(2)    | 6(2)     |
| Ba1                                                | 136(5)   | 116(4)   | 147(7)   | 0        | 13(4)    | 0        |
| 0.75 Pr / 0.25 Li1                                 | 99(3)    | 96(3)    | 84(5)    | 7(3)     | 15(3)    | -7(3)    |
| O1                                                 | 130(40)  | 190(40)  | 190(60)  | 30(30)   | 60(40)   | 40(40)   |
| O2                                                 | 140(40)  | 110(40)  | 220(60)  | 0(30)    | 40(40)   | 30(40)   |
| O3                                                 | 260(50)  | 110(40)  | 90(50)   | -40(30)  | -30(40)  | 10(30)   |
| O4                                                 | 220(50)  | 190(40)  | 160(60)  | 20(40)   | 50(40)   | 40(40)   |
| O5                                                 | 180(40)  | 170(40)  | 120(60)  | 30(30)   | 0(40)    | 10(40)   |
| O6                                                 | 210(50)  | 150(40)  | 120(60)  | 20(30)   | -20(40)  | 0(30)    |
| O7                                                 | 190(40)  | 250(50)  | 110(60)  | 130(40)  | 90(30)   | 70(40)   |
| O8                                                 | 120(40)  | 190(40)  | 240(70)  | 0(30)    | 20(40)   | 40(40)   |
| $\text{Li}_3\text{Ba}_2\text{Tb}_3(\text{WO}_4)_8$ |          |          |          |          |          |          |
| W1                                                 | 138(1)   | 125(1)   | 146(2)   | 2(1)     | -1(1)    | 11(1)    |
| W2                                                 | 138(1)   | 125(1)   | 150(2)   | -3(1)    | -2(1)    | 5(1)     |
| Ba1                                                | 182(2)   | 109(2)   | 197(3)   | 0        | -10(2)   | 0        |
| 0.75 Tb / 0.25 Li1                                 | 133(2)   | 106(2)   | 133(2)   | 2(1)     | -5(1)    | -3(1)    |
| O1                                                 | 190(20)  | 170(20)  | 250(30)  | 19(18)   | 0(20)    | 21(19)   |
| O2                                                 | 180(20)  | 210(20)  | 190(30)  | -42(19)  | 11(19)   | 47(19)   |
| O3                                                 | 200(20)  | 180(20)  | 170(30)  | -40(18)  | 20(18)   | 15(18)   |
| O4                                                 | 220(20)  | 190(20)  | 170(30)  | 13(19)   | -30(19)  | -32(18)  |
| O5                                                 | 200(20)  | 120(20)  | 200(30)  | 15(17)   | -5(19)   | 8(17)    |
| O6                                                 | 190(20)  | 160(20)  | 190(30)  | 12(18)   | -36(19)  | -11(18)  |
| O7                                                 | 160(20)  | 170(20)  | 230(30)  | 13(18)   | 30(19)   | 51(19)   |
| O8                                                 | 170(20)  | 170(20)  | 200(30)  | 12(17)   | -32(19)  | 35(18)   |
